# Supplementary material for: Impact of In Vitro Digestion on the Digestibility, Amino Acid Release, and Antioxidant Activity of Amaranth (Amaranthus cruentus L.) and Cañihua (Chenopodium pallidicaule Aellen) Proteins in Caco-2 and HepG2 Cells
Source: MDPI journal article supplement (doi:10.3390/antiox12122075), 2023-12-05
Supplement: s1 [file s1]

## Supplementary data

**Table S1.** Two-way ANOVA analysis values of percentage of digestibility of *Amaranthus cruentus* and *Chenopodium pallidicaule* proteins, considering the effect of the Food matrix and digestion time.

|                              | df | F        |
|------------------------------|----|----------|
| Food Matrix                  | 1  | 186.31*  |
| Digestion Time               | 8  | 409.23** |
| Food matrix x Digestion Time | 8  | 13.84*   |
| Error                        | 36 |          |

Values with asterisks represent \* $p < 0.01$ , \*\* $p < 0.001$

**Table S2.** Two-way ANOVA analysis values of effect of *in vitro* gastrointestinal digestion on amino acid profile (mg g<sup>-1</sup> protein) of *Amaranthus cruentus* (A) and *Chenopodium pallidicaule* (B) proteins considering the effect of the Food Matrix and Digestion phase.

| <b>A</b>                      | df | F          |
|-------------------------------|----|------------|
| Amino acids                   | 16 | 2687.4**   |
| Digestion phase               | 1  | 108209.4** |
| Amino acids x Digestion phase | 16 | 2071.3**   |
| Error                         | 68 |            |

| <b>B</b>        | df | F          |
|-----------------|----|------------|
| Amino acids     | 16 | 7396.3**   |
| Digestion phase | 1  | 290259.1** |
| Amino acids x   | 16 | 6168.9**   |
| Error           | 68 |            |

Values with asterisks represent \*\* $p < 0.001$

**Table S3.** Two-way ANOVA analysis values of antioxidant activity by ORAC, ABTS and DPPH assays, considering the effect of the Food matrix and digestion phase.

|                        |    | ORAC     | ABTS     | DPPH     |
|------------------------|----|----------|----------|----------|
|                        | df | <i>F</i> | <i>F</i> | <i>F</i> |
| Food matrix            | 2  | 530.57** | 6.42*    | 171.9**  |
| Digestion phase        | 1  | 75.2**   | 3204.2** | 131.8**  |
| Food matrix x Digested | 2  | 22.44**  | 4.5*     | 32.9**   |
| Error                  | 12 |          |          |          |

Values with asterisks represent \* $p < 0.01$ , \*\* $p < 0.001$

**Table S4.** Source of variation of the three-way ANOVA model for cellular antioxidant activity in HepG2 (A) and Caco-2 cells (B) comparing the three factors: Food matrix, Sample and Concentration, and their respective interactions.

| <b>A</b> | Source of variation                  | df | <i>F</i> | <i>p</i> | Post hoc                  |
|----------|--------------------------------------|----|----------|----------|---------------------------|
|          | Food matrix                          | 1  | 7.214    | 0.01     | A = C                     |
|          | Concentration                        | 1  | 734.422  | 0.001    | 0.750 > 0.250             |
|          | Sample                               | 5  | 324.828  | 0.001    | U, G<5, G>5, I<5, I>5 > C |
|          | Food Matrix x Concentration          | 1  | 2.850    | 0.097    |                           |
|          | Food Matrix x Sample                 | 5  | 4.983    | 0.001    |                           |
|          | Concentration x Sample               | 5  | 40.720   | 0.0      | NS                        |
|          | Food matrix x Concentration x Sample | 5  | 0.656    | 0.656    |                           |
|          | Error                                | 48 |          |          |                           |

| <b>B</b> | Source of variation                  | df | <i>F</i> | <i>p</i> | Post hoc                  |
|----------|--------------------------------------|----|----------|----------|---------------------------|
|          | Food Matrix                          | 1  | 0.030    | 0.862    | A = C                     |
|          | Sample                               | 5  | 445.609  | 0.001    | U, G<5, G>5, I<5, I>5 > C |
|          | Concentration                        | 1  | 3948.590 | 0.001    | 0.750 > 0.250             |
|          | Food Matrix x Sample                 | 5  | 3.876    | 0.004    |                           |
|          | Food Matrix x Concentration          | 1  | 0.024    | 0.877    |                           |
|          | Sample x Concentration               | 5  | 183.094  | 0.0      | NS                        |
|          | Food Matrix x Sample x Concentration | 5  | 3.906    | 0.004    |                           |
|          | Error                                | 48 |          |          |                           |

NS= not significant
